# Supplementary material
Source: Springer Nature journal article supplement (https://www.springermedizin.de/resource/supplementary/13046_2009_152_MOESM1_ESM.pdf/9661740)

**a**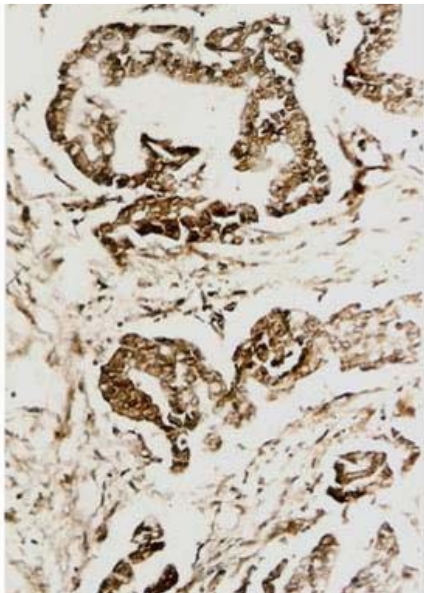**b**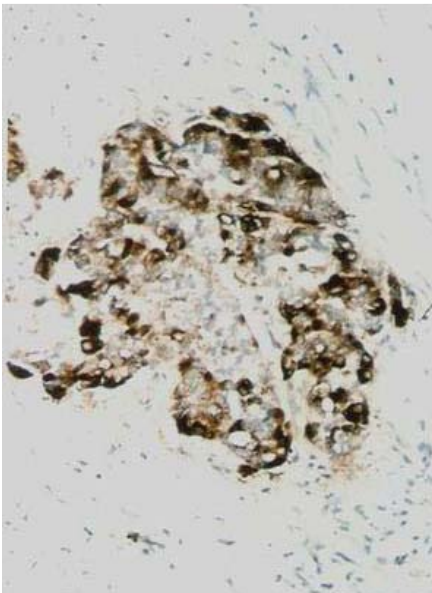**c**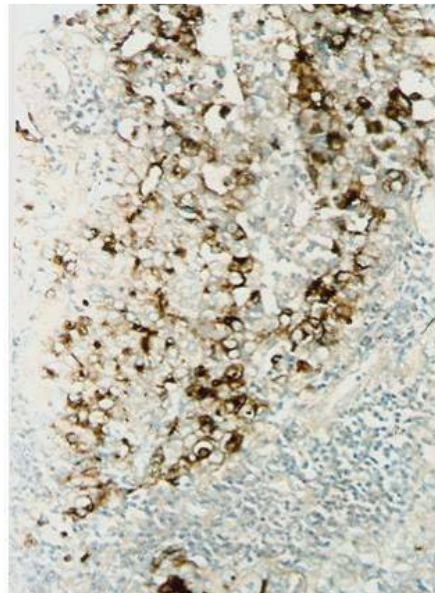**d**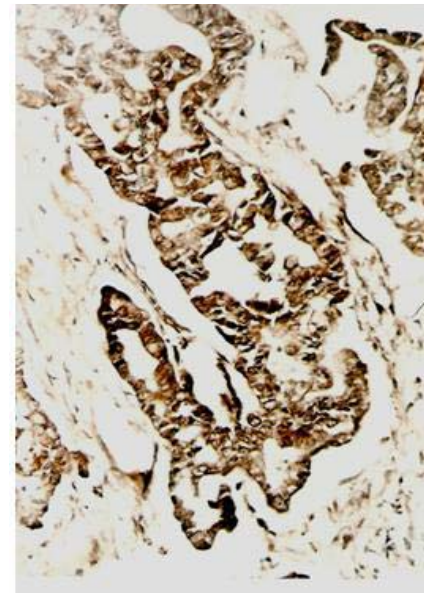**e**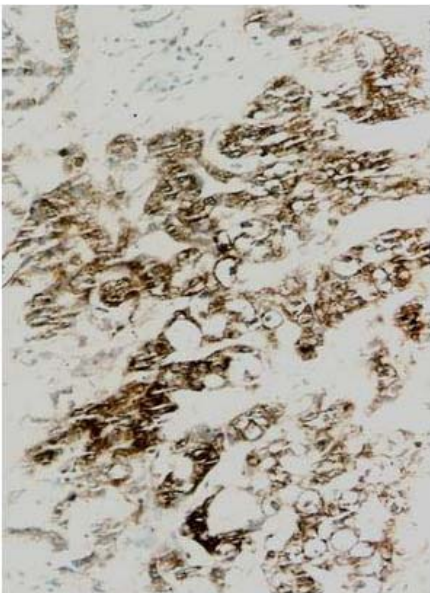**f**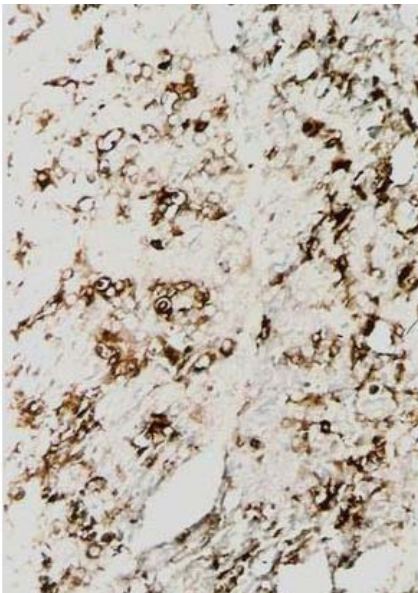

Supplement: MOESM1 [file 9661740]
